# Supplementary material
Source: PubMed Central journal article supplement (PMC1472513)
Supplement: pnas_0600206103_2.pdf [file pnas_0600206103_2.pdf]

|   |          |   |          |          |   |          |          |          |   |          |          |          |                                   |
|---|----------|---|----------|----------|---|----------|----------|----------|---|----------|----------|----------|-----------------------------------|
| A | <b>K</b> | S | <b>R</b> | <b>P</b> | A | <b>W</b> | <b>P</b> | <b>R</b> | L | <b>P</b> | <b>P</b> | <b>A</b> | Human del23bp                     |
| A | <b>K</b> | S | <b>R</b> | <b>P</b> | A | <b>P</b> | <b>Y</b> | <b>P</b> | L | <b>P</b> | G        | L        | Human/ Mouse (O43435-3/NP_035662) |
| A | <b>K</b> | T | <b>R</b> | <b>P</b> | A | <b>P</b> | <b>Y</b> | <b>P</b> | L | <b>P</b> | T        | I        | Frog (AAN77134)                   |
| A | <b>K</b> | T | <b>R</b> | <b>P</b> | S | <b>P</b> | <b>Y</b> | <b>P</b> | S | <b>P</b> | S        | I        | Zebrafish (AAP33907)              |
| T | <b>K</b> | T | <b>R</b> | <b>P</b> | S | <b>P</b> | <b>Y</b> | <b>P</b> | L | <b>P</b> | G        | I        | Fugu (CAG09712)                   |
| A | <b>K</b> | T | <b>R</b> | <b>P</b> | T | <b>P</b> | <b>Y</b> | <b>P</b> | L | <b>P</b> | S        | M        | Branchiostoma (AAG34887)          |
