# Supplementary material
Source: PubMed Central journal article supplement (PMC1472513)

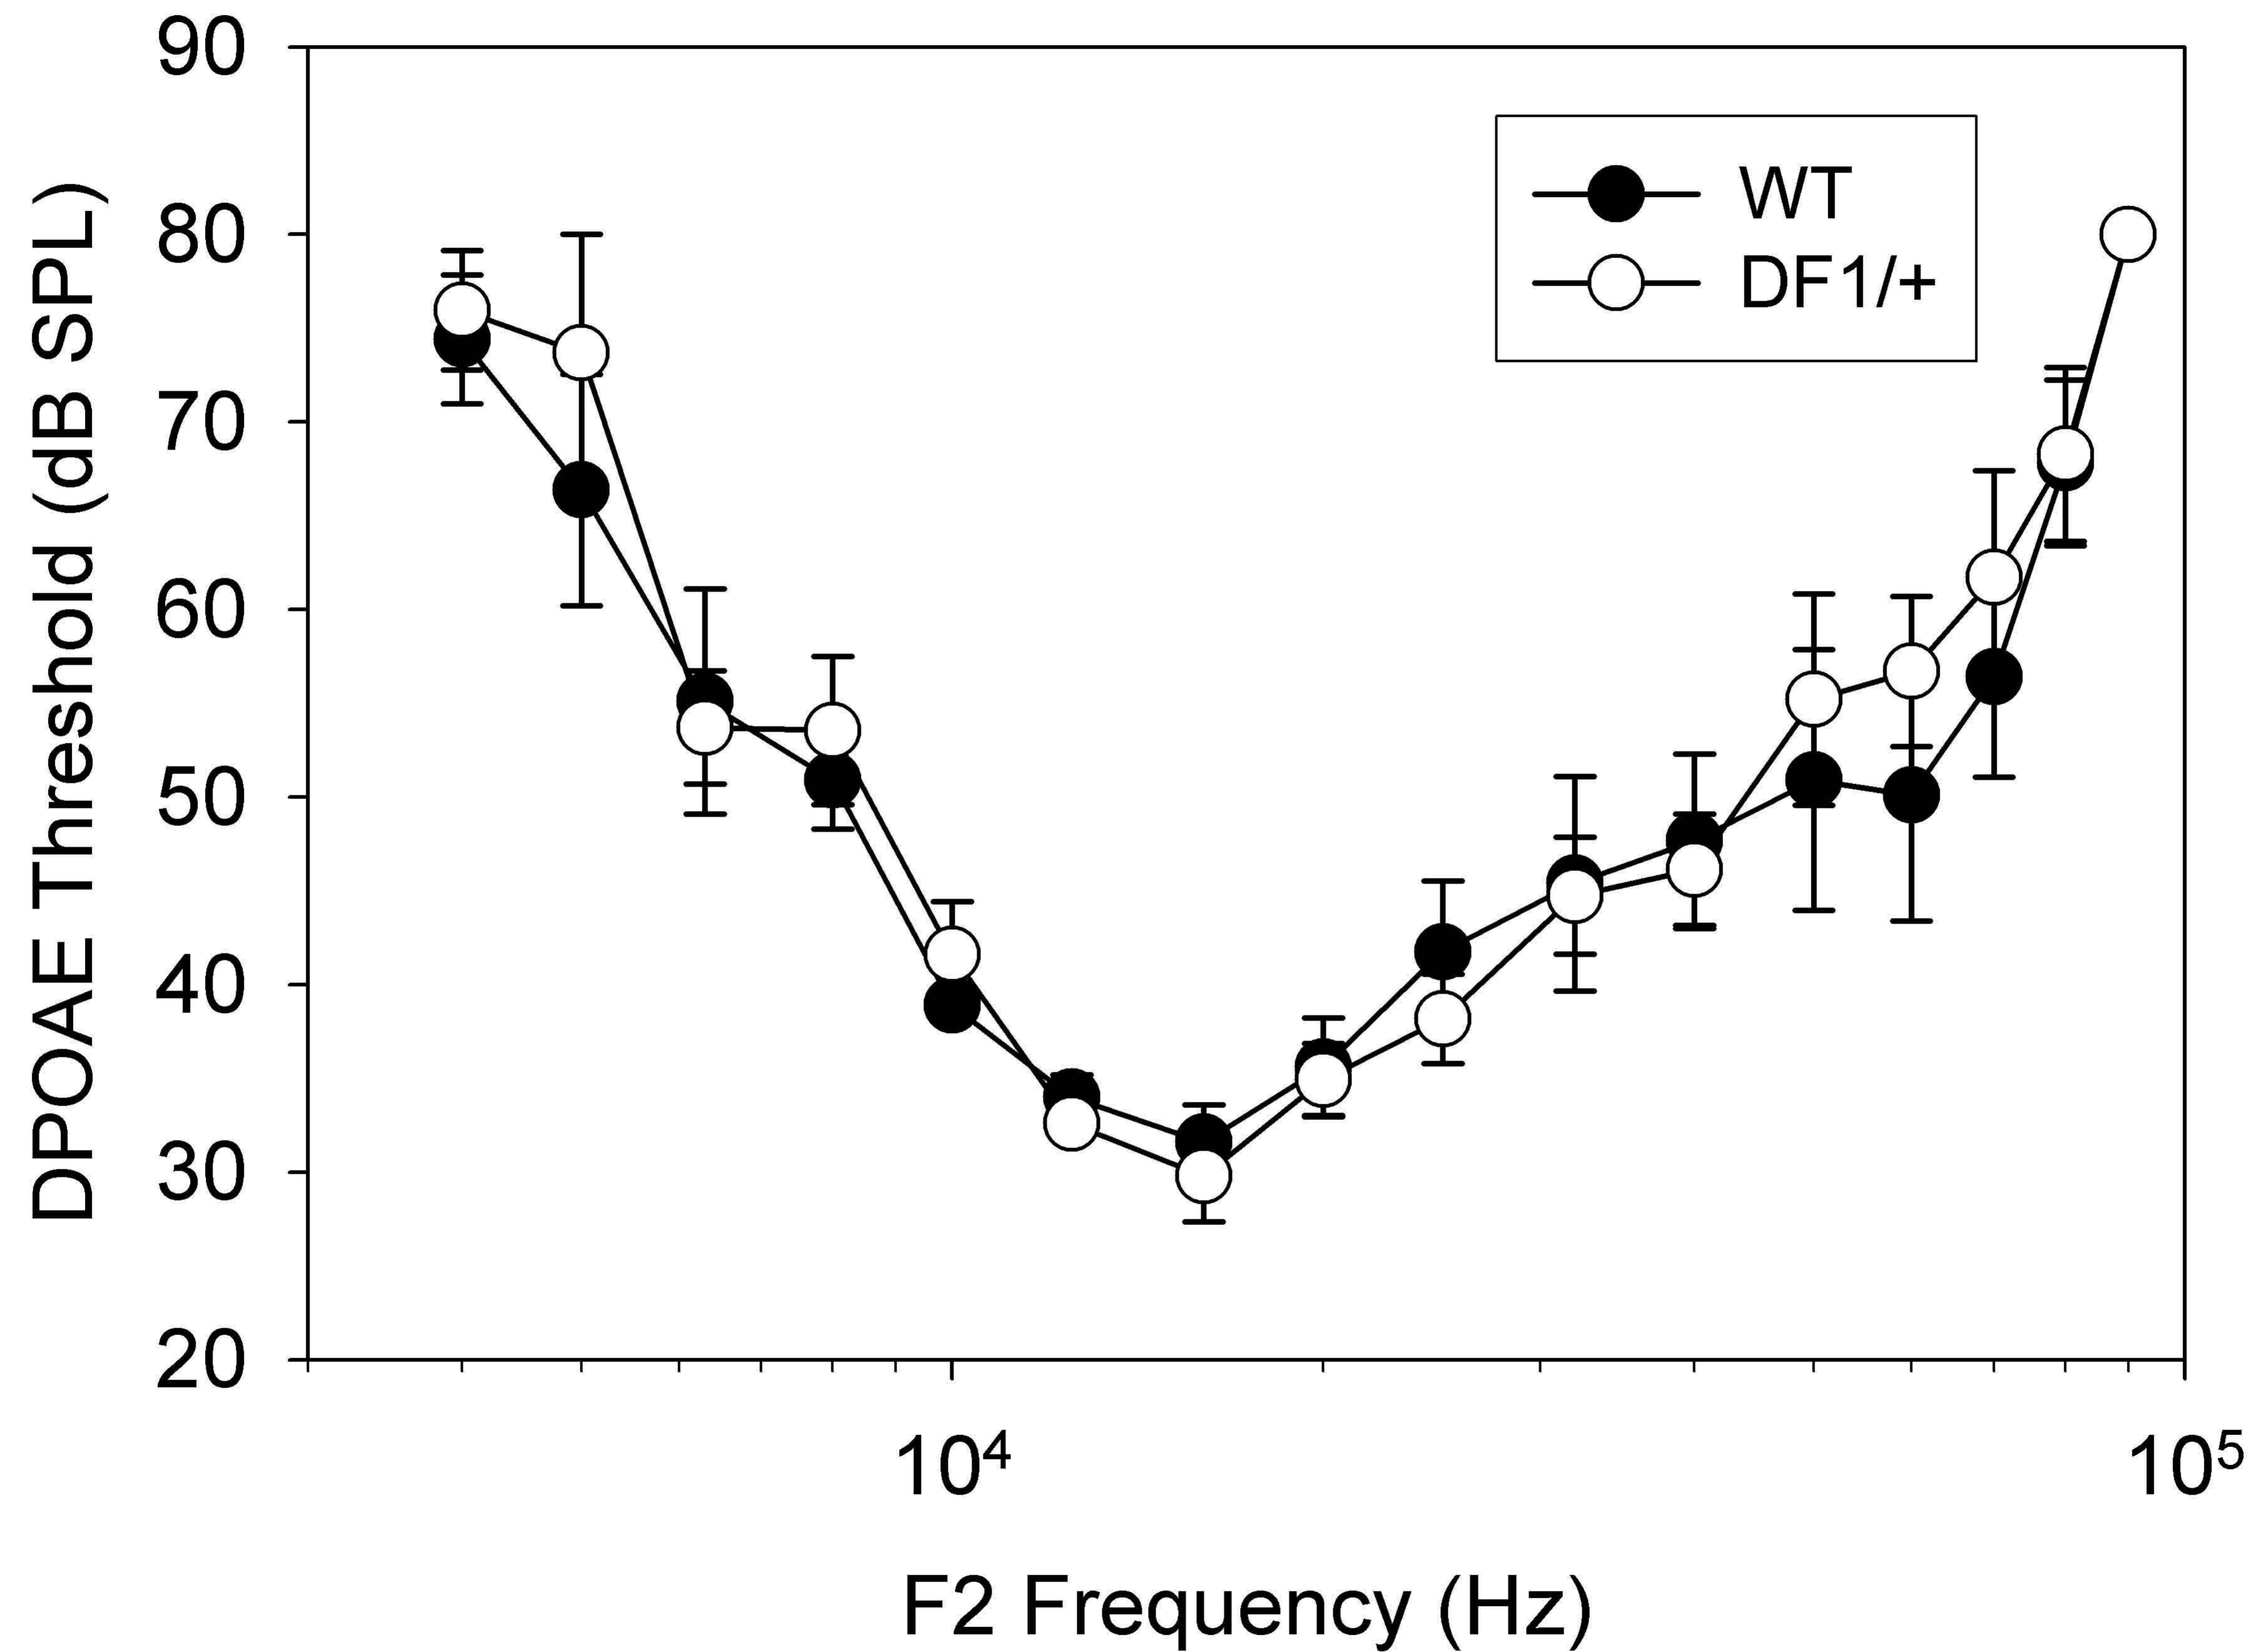

Supplement: pnas_0600206103_1.pdf [file pnas_0600206103_1.pdf]

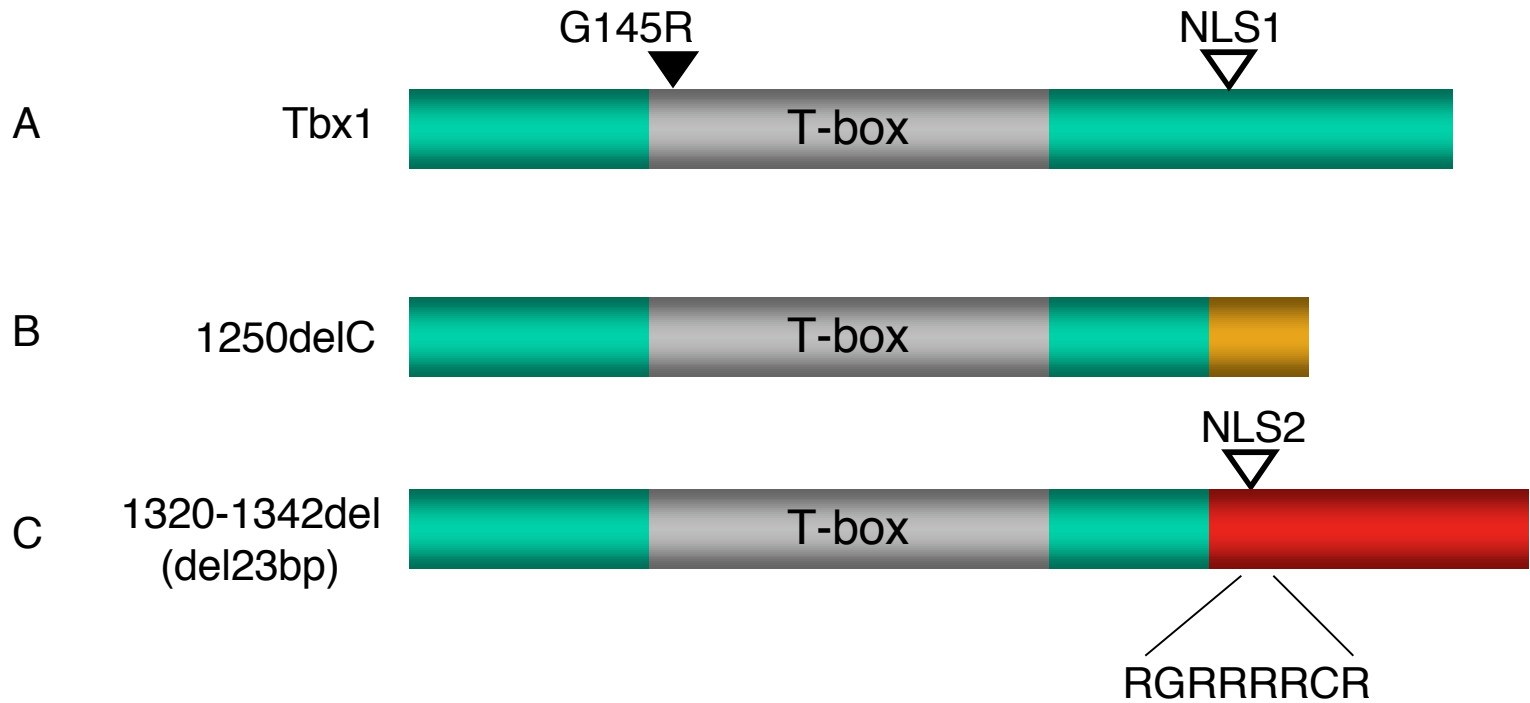

Supplement: pnas_0600206103_3.pdf [file pnas_0600206103_3.pdf]
